# Supplementary material for: Mammalian-like type II glutaminyl cyclases in Porphyromonas gingivalis and other oral pathogenic bacteria as targets for treatment of periodontitis
Source: PubMed Central journal article supplement (PMC7948796; doi:10.1016/j.jbc.2021.100263), 2021-01-08
Supplement: mmc1.pdf [file mmc1.pdf]

## Supplementary Information for

### Mammalian-like type II glutaminyl cyclases in *Porphyromonas gingivalis* and other oral pathogenic bacteria as targets for treatment of periodontitis

Nadine Taudte, Miriam Linnert, Jens-Ulrich Rahfeld, Anke Piechotta, Daniel Ramsbeck, Mirko Buchholz, Petr Kolenko, Christoph Parthier, John A. Houston, Florian Veillard, Sigrun Eick, Jan Potempa, Stephan Schilling, Hans-Ulrich Demuth, Milton T. Stubbs

#### This PDF file includes:

Supplementary Figure 1: QC activity measurements for bacteroidal QC catalyzed cyclization of the fluorogenic substrate H-Gln-AMC

Supplementary Figure 2: Inhibition of bacteroidal QC activity by metal chelators

Supplementary Figure 3: Inhibition of *PgQC* activity by 1-benzylimidazole

Supplementary Figure 4: Structure based sequence alignments of bacteroidal QCs, animal QCs and aminopeptidases

Supplementary Figure 5: Structural conservation between bacteroidal QCs and aminopeptidases

Supplementary Figure 6: Overlay of *BvQC* and *PgQC* coordinates, demonstrating lack of structure for loops surrounding the active site zinc

Supplementary Figure 7: SDS-PAGE of purified recombinant bacteroidal QCs

Supplementary Movie 1: Structural differences in the *TfQC* “6-E” loop due to proline *cis-trans* isomerization

Supplementary Movie 2: Sequence conservation in *PgQC*

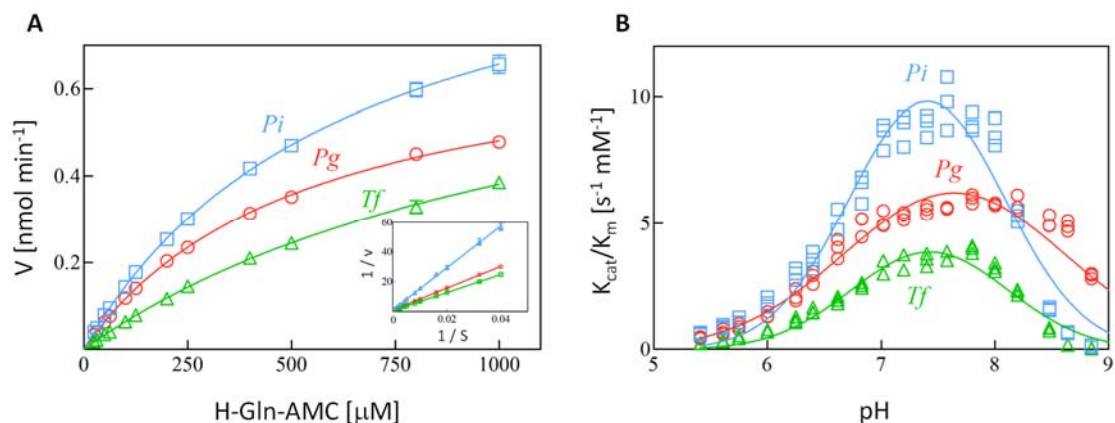

**Supplementary Figure 1: QC activity measurements for bacteroidal QC catalyzed cyclization of the fluorogenic substrate H-Gln-AMC.** (A)  $v/S$ -characteristics and Lineweaver-Burk plots for *Pg*QC (red circles), *Tf*QC (green triangles) and *Pi*QC (blue squares). QC activity measurements were performed in 50 mM Tris-HCl, pH 8.0 and 50 mM NaCl at 30°C. Kinetic data were evaluated using GraFit software (Version 7, Erithacus software Ltd., Horley, UK). (B) pH dependence of *Pg*QC, *Tf*QC, and *Pi*QC activities; colors and symbols as in (A). The specificity constants  $k_{cat}/K_M$  were determined under first-order rate law conditions with substrate concentrations of  $1/10 K_M$ . Measurements were carried out at 30°C in buffer consisting of 0.1 M Tris-HCl, 0.05 MES, 0.05 mM acetic acid and 0.05 mM NaCl.

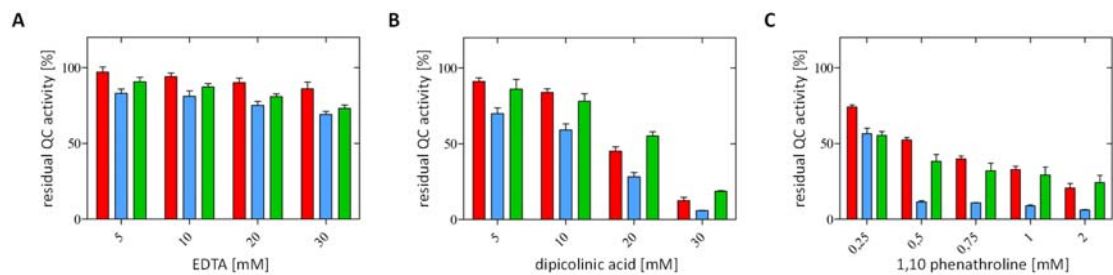

**Supplementary Figure 2: Inhibition of bacteroidal QC activity by metal chelators:** (A) EDTA, (B) dipicolinic acid and (C) 1,10-phenanthroline. 250  $\mu$ M H-Gln-AMC and increasing chelator concentrations were used to investigate the inhibitory effect on QC activity. Bars indicate residual QC activity following initiation of the reaction by adding 5 nM QC (red: *PgQC*; green: *PiQC*; blue: *TjQC*). All measurements were performed at 30°C as described in the text.

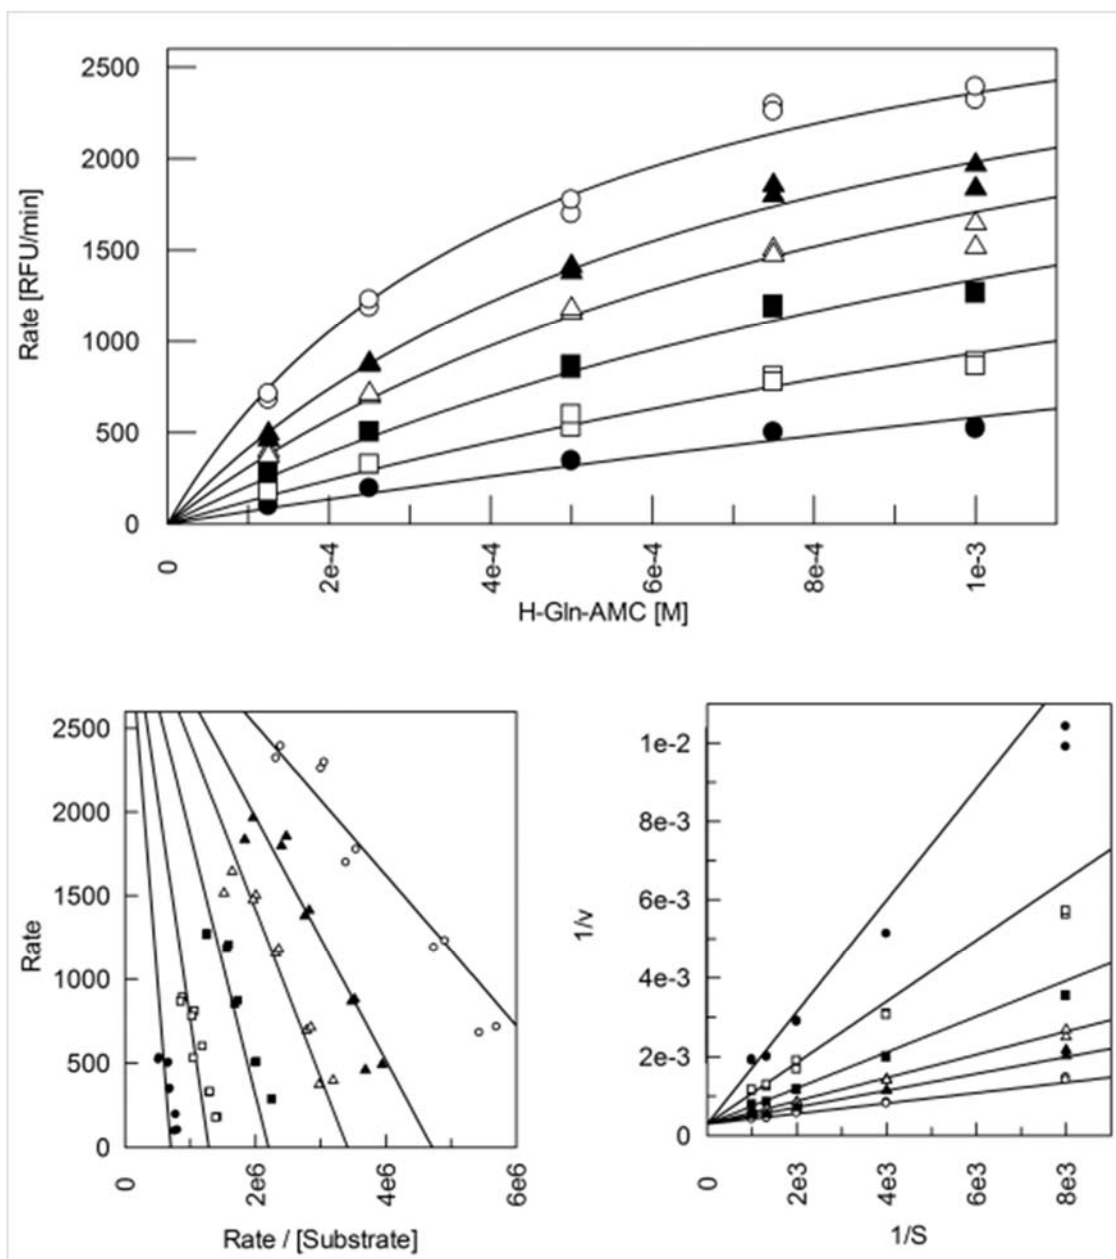

**Supplementary Figure 3: Inhibition of *PgQC* activity by 1-benzylimidazole.**  $v/S$  characteristics, Lineweaver-Burk and Eadie-Hofstee plots for *PgQC* catalyzed cyclization of H-Gln-AMC in presence of 1-benzylimidazole. Variation of 1-benzylimidazole concentrations is as follows: (●) 100  $\mu\text{M}$ , (◻) 50  $\mu\text{M}$ , (◼) 25  $\mu\text{M}$ , (△) 12.5  $\mu\text{M}$  and (▲) 6.25  $\mu\text{M}$ . In each panel, (○) represents reaction without inhibitor. Determinations were carried out in 50 mM Tris-HCl, 50 mM NaCl pH 8.0 and 1% (v/v) DMSO at 30°C.

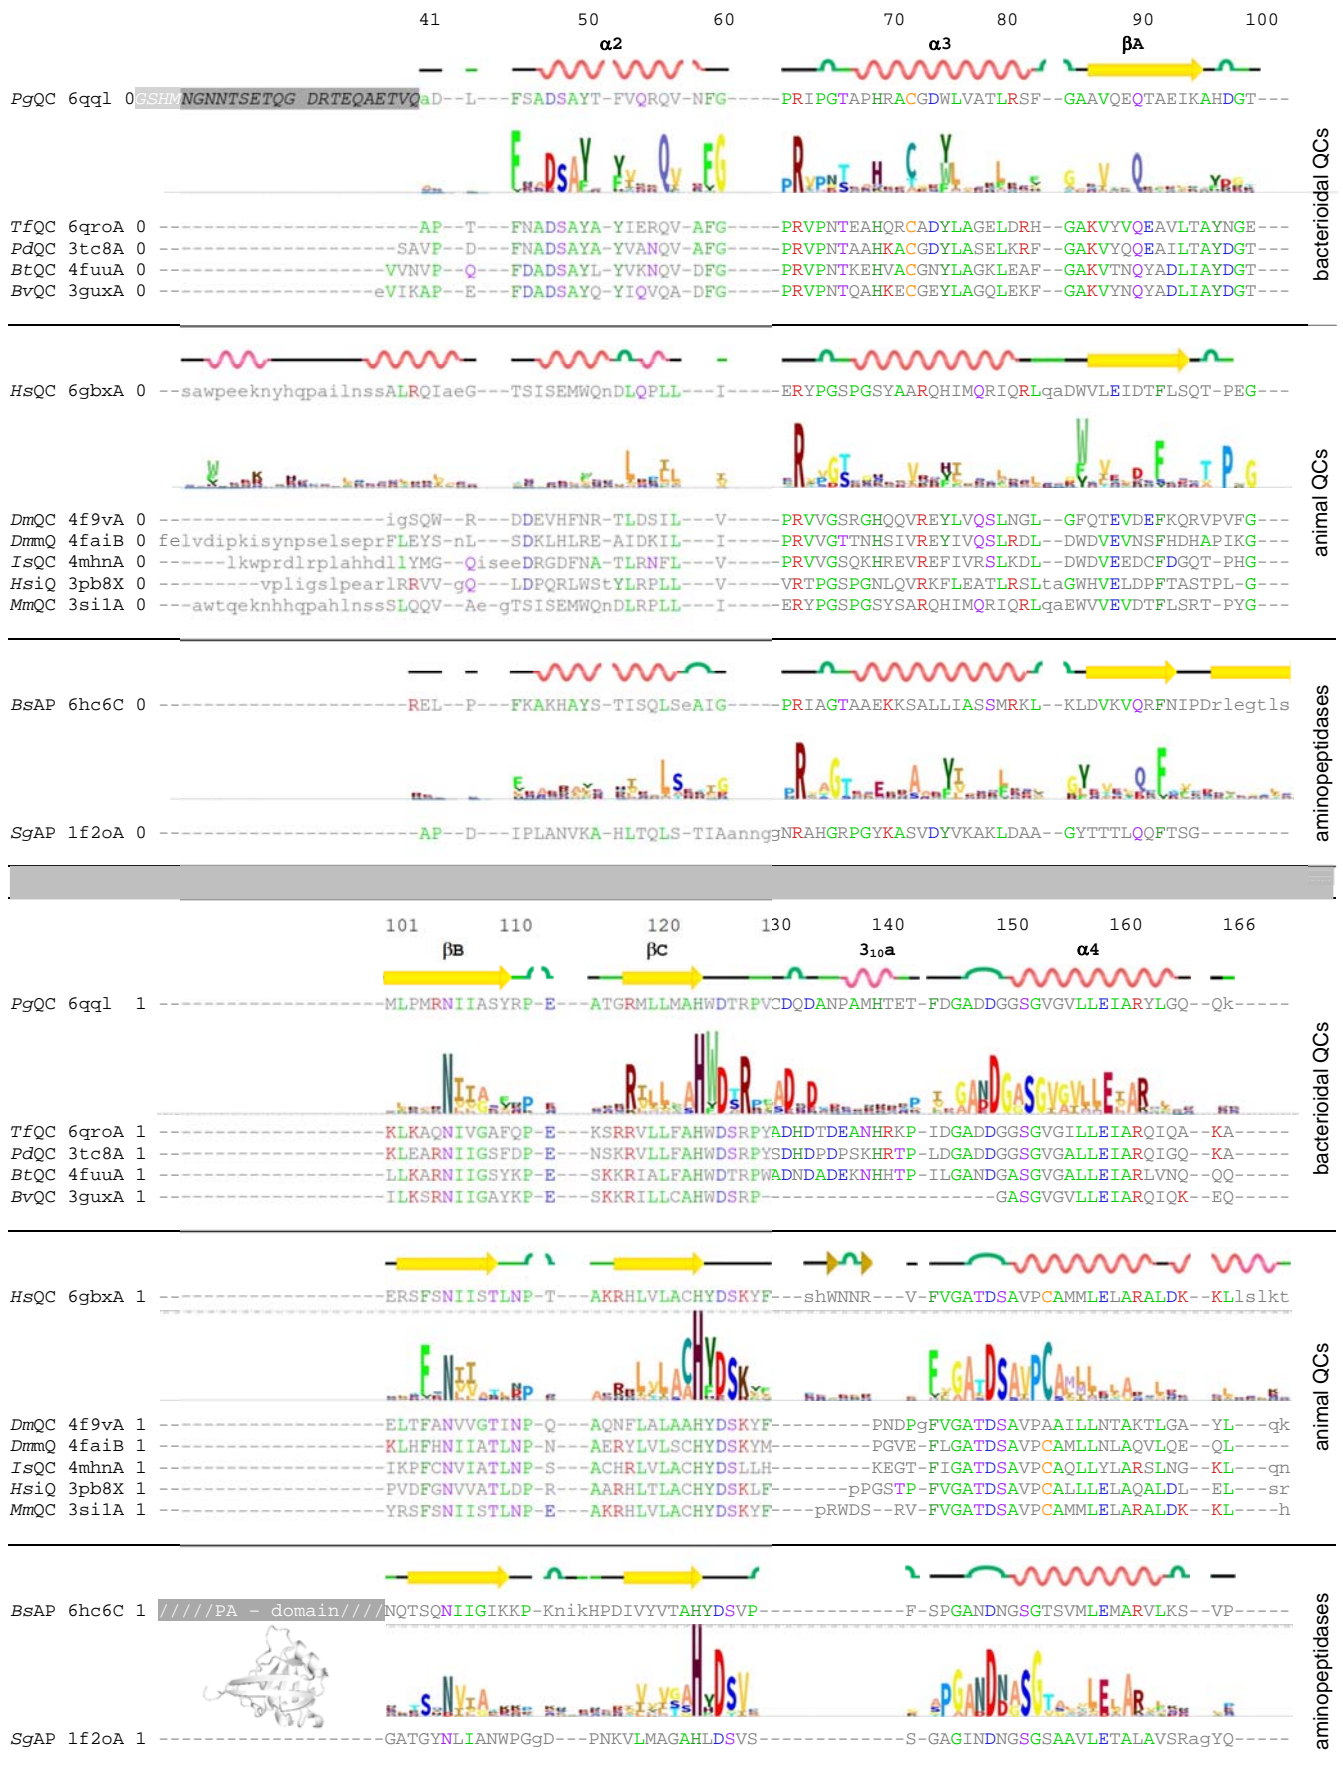

**Supplementary Figure 4. Structure based sequence alignments of bacteroidial QCs, animal QCs and aminopeptidases** (results from DALI search, residue numbering for *PgQC*) together with secondary structure assignments and sequence logos (per-residue conservation among related sequences) for *PgQC*, *HsQC* and *BsAP*; the latter exhibits a ca. 120 residue PA-domain insertion. See also **Supplementary Figure 5** and **Movie 2**.

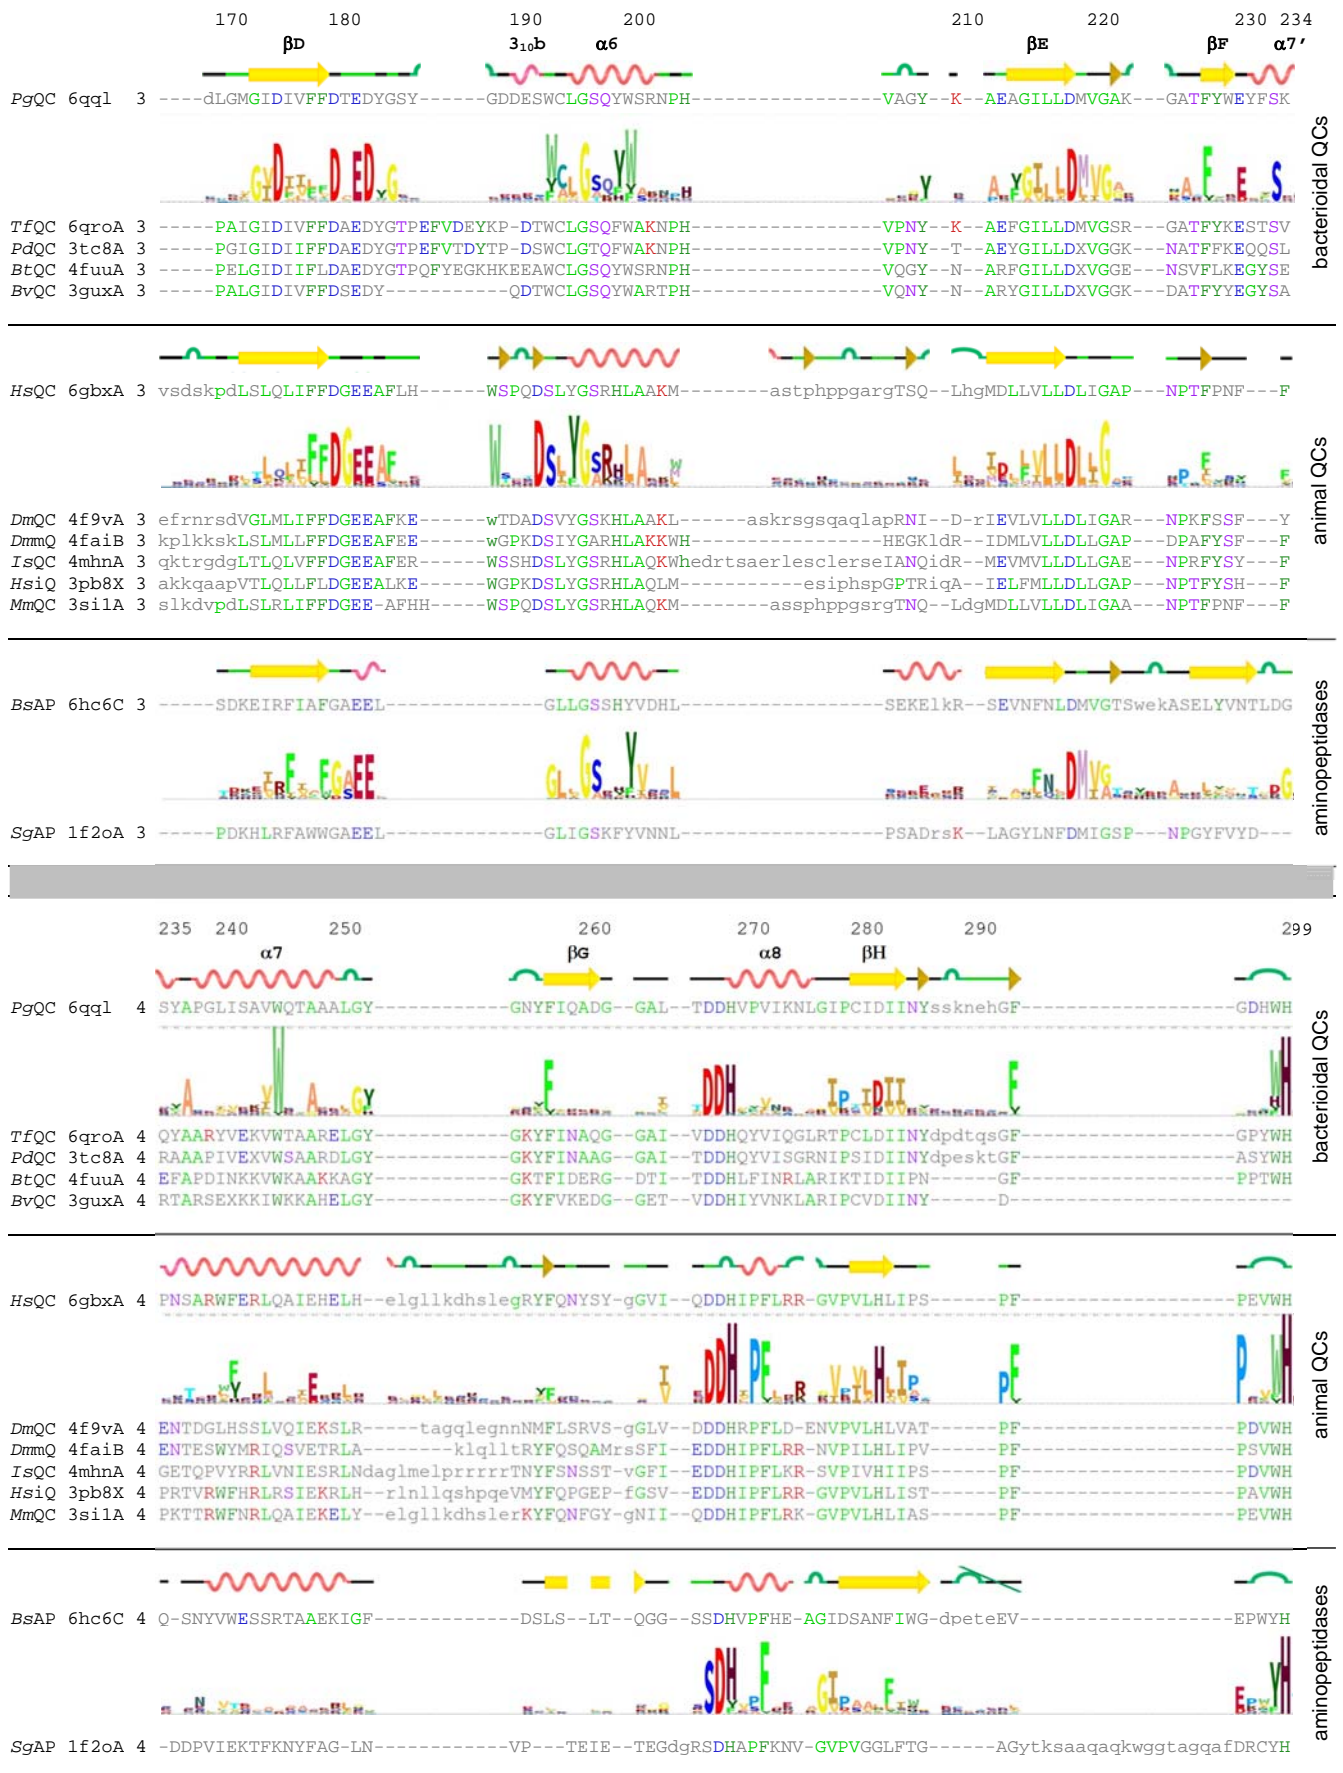

**Supplementary Figure 4 (continued). Structure based sequence alignments of bacteroidal QCs, animal QCs and aminopeptidases (results from DALI search, residue numbering for *PgQC*) together with secondary structure assignments and sequence logos (per-residue conservation among related sequences) for *PgQC*, *HsQC* and *BsAP*; the latter exhibits a ca. 120 residue PA-domain insertion. See also **Supplementary Figure 5** and **Movie 2**.**

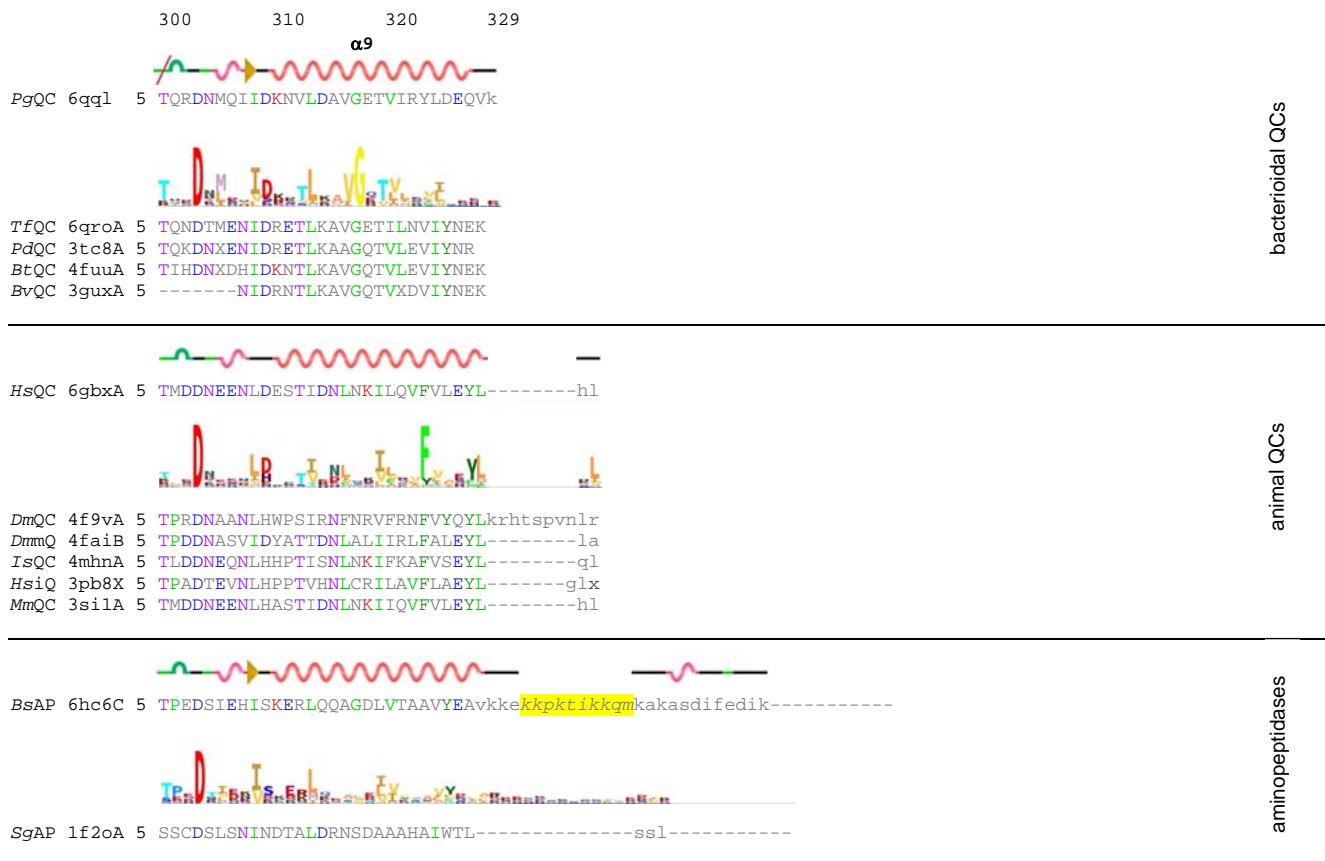

**Supplementary Figure 4 (continued). Structure based sequence alignments of bacterioidal QCs, animal QCs and aminopeptidases** (results from DALI search, residue numbering for *PgQC*) together with secondary structure assignments and sequence logos (per-residue conservation among related sequences) for *PgQC*, *HsQC* and *BsAP*; the latter exhibits a ca. 120 residue PA-domain insertion. See also **Supplementary Figure 5 and Movie 2**.

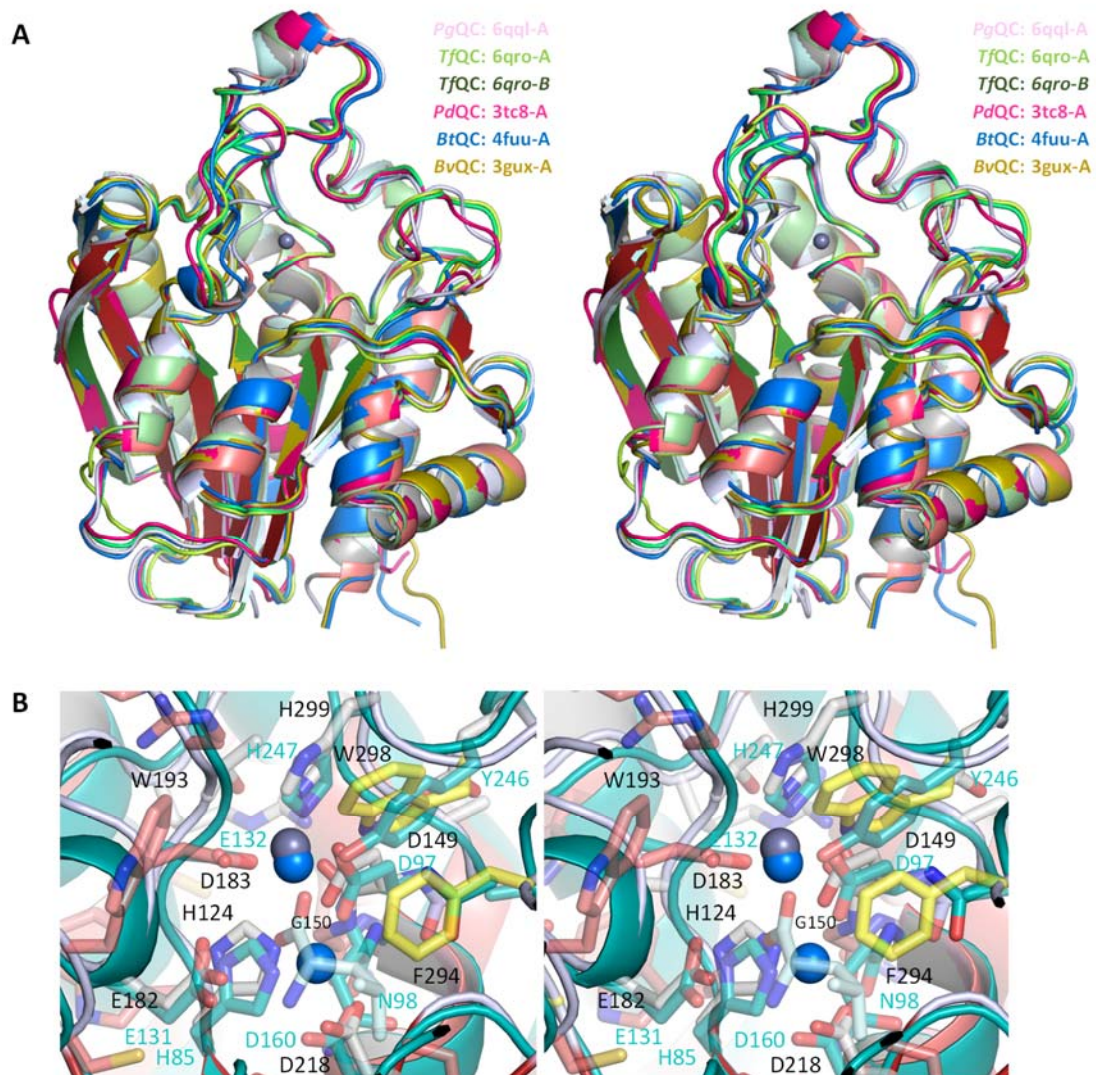

**Supplementary Figure 5: Structural conservation between bacteroidal QCs and aminopeptidases.** (A) Superposition of bacteroidal QCs in stereo cartoon representation. (B) Superposition of *PgQC* active site (colors as in Supplementary Movie 2) and the *Streptomyces griseus* aminopeptidase (1f2o) with two zinc ions (blue) complexed with L-Leucine product (transparent sticks).



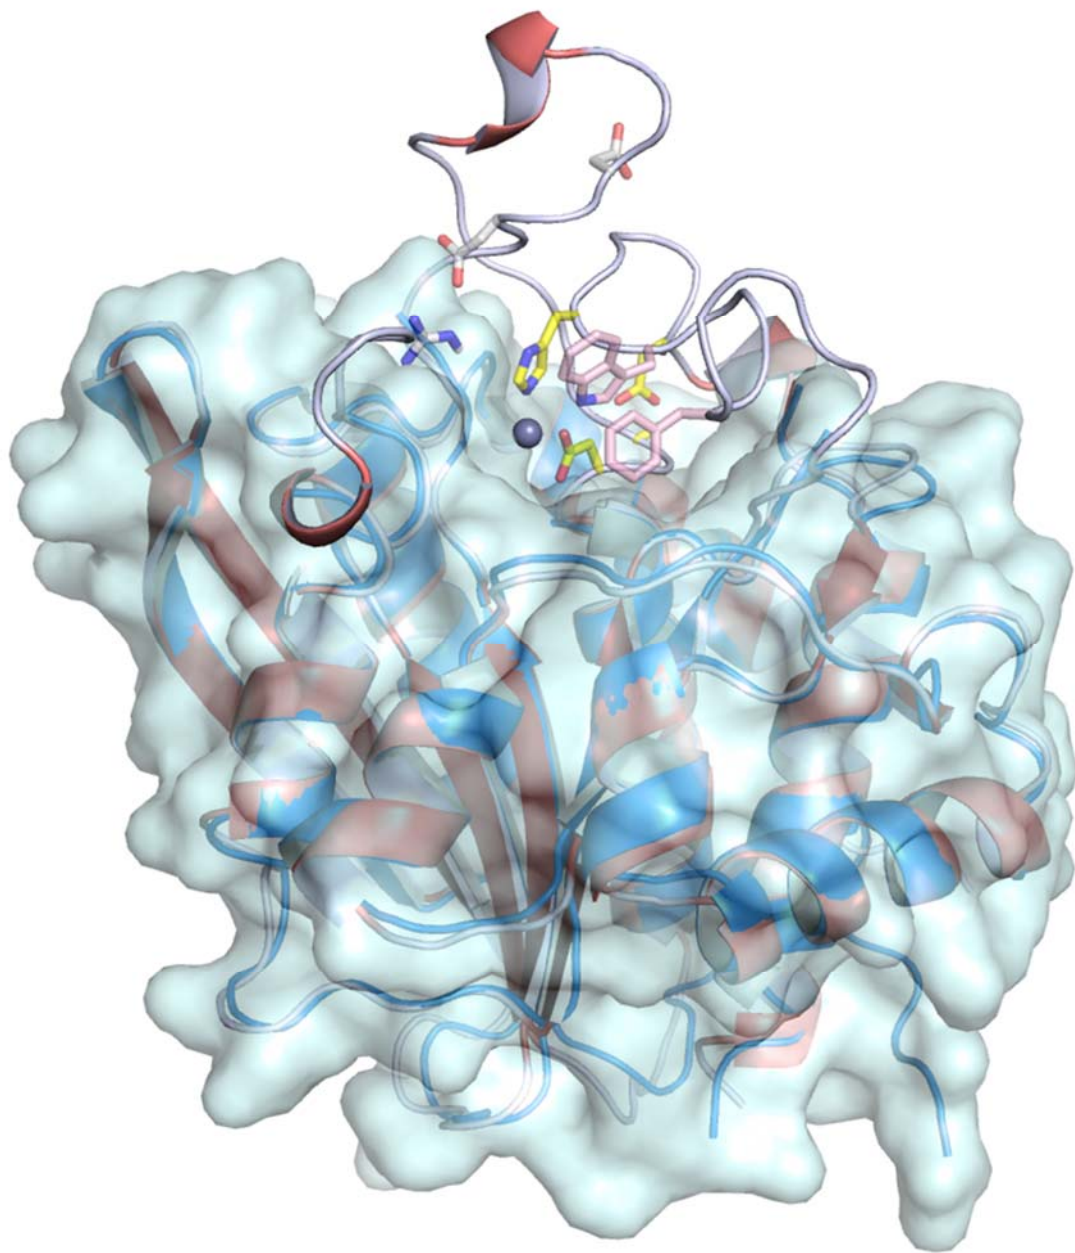

**Supplementary Figure 6: Overlay of *BvQC* (3gux, blue cartoon) and *PgQC* (6qql, pink cartoon) coordinates, together with blue surface delineating resolved residues in *BvQC*, demonstrating lack of structure for loops surrounding the active site zinc.**

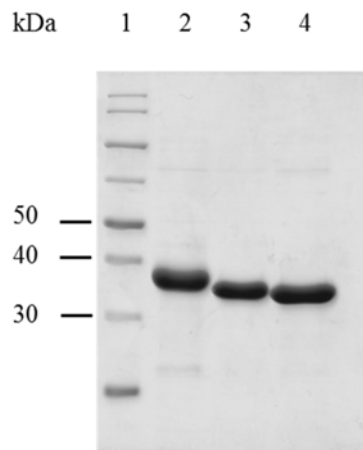

**Supplementary Figure 7: SDS-PAGE of purified recombinant bacteroidal QCs** expressed in *E. coli* Rosetta(DE3)pLysS. 10  $\mu$ g purified protein were loaded to a 12% SDS-PAGE and visualized by coomassie staining, lane 1, PageRuler Broad Range unstained (ThermoFisher Scientific), lane 2, PgQC, lane 3, PiQC and lane 4, TfQC.

**“trans”**

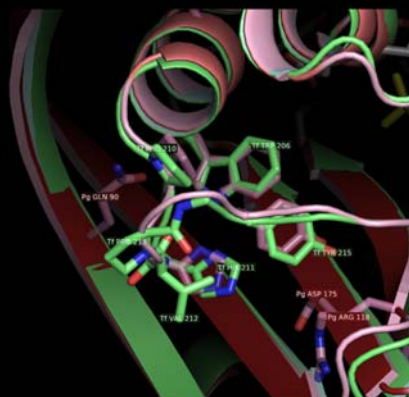

**“morph”**

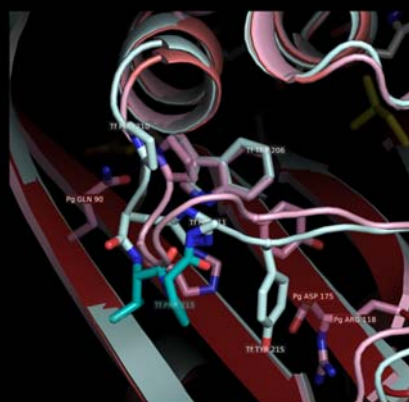

**“cis”**

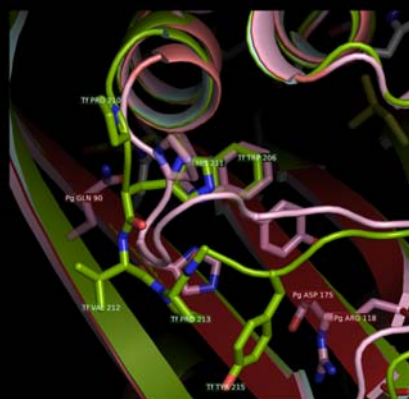

**Supplementary Movie 1: Structural differences in the *TfQC* “6-E” loop due to proline *cis-trans* isomerization.** *TfQC* monomers A (dark green) and B (apple green) superimposed on *PgQC* (red tones, orientation as in Figure 3C). Due to *cis-trans*- isomerization of the *TfVal212-Pro213* peptide bond, two routes are observed for the *TfQC* “6-E” loop, resulting in a slight reorientation of the  $\alpha_6$  helix. Morphing between the two monomer structures was mapped using PyMol. Residues conserved in *PgQC*-like sequences (Supplementary Figure 4, Movie 2) are shown as pink sticks.

“front”

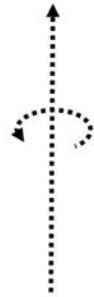

“back”

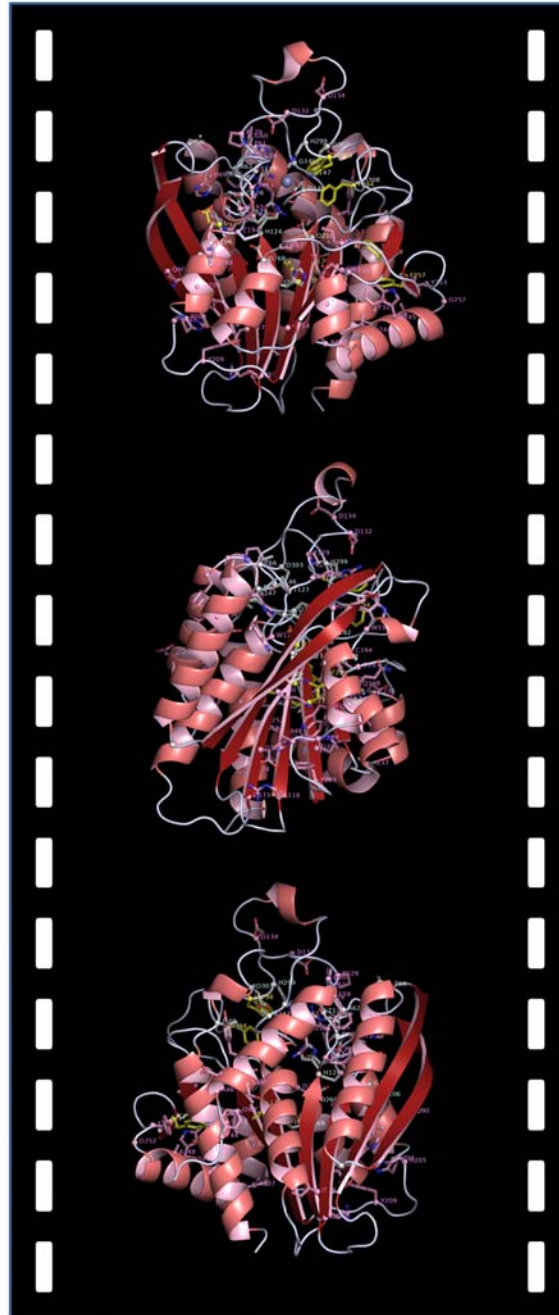

**Supplementary Movie 2: Sequence conservation in *PgQC*.** The *PgQC* cartoon is superimposed with residues conserved among bacteroidal QCs (pink sticks), type II QCs (yellow sticks) and aminopeptidases (white sticks); c.f. Supplementary Figure 4.
